# Supplementary material
Source: PubMed Central journal article supplement (PMC3670944)
Supplement: NIHMS448436-supplement-01.pdf [file NIHMS448436-supplement-01.pdf]

## Supplemental Materials

**Supplemental Table 1. SNP List**

| #  | RS Number   | gene           | Type of polymorphism | Biologic Pathway                            |
|----|-------------|----------------|----------------------|---------------------------------------------|
| 1  | rs1799963   | F2             | UTR3                 | Coagulation cascade/natural anticoagulation |
| 2  | rs6025      | F5 Leiden      | Silent mutation      |                                             |
| 3  | rs1800595   | F5 (R2 allele) | Missense mutation    |                                             |
| 4  | rs4524      | F5             | Missense mutation    |                                             |
| 5  | rs6049      | F9             | Donor splice site    |                                             |
| 6  | rs6048      | F9 Malmö       | Missense mutation    |                                             |
| 7  | rs2036914   | F11            | Intron               |                                             |
| 8  | rs2289252   | F11            | Intron               |                                             |
| 9  | rs3756008   | F11            | Intergenic           |                                             |
| 10 | rs13146272* | CYP4V2         | Missense mutation    |                                             |
| 11 | rs2227589   | SERPINC1       | Intron               |                                             |
| 12 | rs2066865   | FGG            | Intergenic           |                                             |
| 13 | rs1800450   | MBL2           | Missense mutation    | Innate immunity/complement                  |
| 14 | rs1800451   | MBL2           | Missense mutation    |                                             |
| 15 | rs5030737   | MBL2           | Missense mutation    |                                             |
| 16 | rs1838065   | MBL2           | Intron               |                                             |
| 17 | rs7096206   | MBL2           | Intergenic           |                                             |
| 18 | rs9332245   | CYP2C9         | Intergenic           | Warfarin Metabolism                         |
| 19 | rs1799853   | CYP2C9         | Missense mutation    |                                             |
| 20 | rs9923231   | VKORC1         | Intergenic           |                                             |

|    |           |           |                   |                         |
|----|-----------|-----------|-------------------|-------------------------|
| 21 | rs9934438 | VKORC1    | Intron            |                         |
| 22 | rs1801690 | APOH      | Missense mutation | Glycoproteins           |
| 23 | rs1613662 | GP6/RDH13 | Missense mutation |                         |
| 24 | rs1801131 | MTHFR     | Missense mutation | Homocysteine metabolism |
| 25 | rs1801133 | MTHFR     | Missense mutation |                         |
| 26 | rs20455   | KIF6      | Missense mutation | Other                   |
| 27 | rs2001436 | NAT8B     | Intergenic        |                         |
| 28 | rs1523127 | NR1 2     | UTR5              |                         |
| 29 | rs2234628 | XYLB      | Intron            |                         |
| 30 | rs1417121 | AKT3      | Intron            |                         |
| 31 | rs2266911 | ODZ1      | Intron            |                         |
| 32 | rs670659  | RGS7      | Intron            |                         |
| 33 | rs2585008 | CASP8AP2  | Intron            |                         |

---

Supplemental Table 2: Call rates, genotype counts and HWE p values in post-QC subjects.

| SNP                       | Gene             | Minor Allele | MAF*                               | Call rate cases (%) | Call rate controls (%) | Genotype counts (AA/AB/BB) cases | Genotype counts (AA/AB/BB) controls | HWE controls (p value) |
|---------------------------|------------------|--------------|------------------------------------|---------------------|------------------------|----------------------------------|-------------------------------------|------------------------|
| <b>DISCOVERY COHORT</b>   |                  |              | cases n=253/<br>controls n=353 (%) |                     |                        |                                  |                                     |                        |
| rs9923231                 | <i>VKORC1</i>    | G            | 0.254/0.124                        | 99                  | 100                    | 25/78/149                        | 11/66/276                           | 0.012                  |
| rs9934438                 | <i>VKORC1</i>    | C            | 0.258/0.124                        | 99                  | 100                    | 26/78/148                        | 11/66/276                           | 0.012                  |
| rs1801690                 | <i>APOH</i>      | G            | 0.036/0.0734                       | 100                 | 100                    | 0/18/235                         | 2/48/303                            | 1                      |
| rs1801131                 | <i>MTHFR</i>     | G            | 0.296/0.205                        | 100                 | 100                    | 21/108/124                       | 18/109/226                          | 0.33                   |
| rs1613662                 | <i>GP6/RDH13</i> | G            | 0.055/0.008                        | 100                 | 100                    | 1/26/226                         | 0/6/347                             | 1                      |
| <b>REPLICATION COHORT</b> |                  |              | cases n=1496/<br>controls n=993    |                     |                        |                                  |                                     |                        |
| rs9923231                 | <i>VKORC1</i>    | C            | 0.135/0.092                        | 99                  | 96                     | 30/342/1117                      | 13/157/821                          | 0.51                   |
| rs9934438                 | <i>VKORC1</i>    | G            | 0.136/0.093                        | 99                  | 99                     | 30/346/1119                      | 13/158/821                          | 0.58                   |
| rs1801690**               | <i>APOH</i>      | G            | 0.104/0.083                        | 89                  | 67                     | 7/63/285                         | 3/42/242                            | 0.42                   |
| rs1801131                 | <i>MTHFR</i>     | C            | 0.215/0.206                        | 99                  | 99                     | 67/507/916                       | 44/320/625                          | 0.82                   |
| rs1613662                 | <i>GP6/RDH13</i> | G            | 0.023/0.015                        | 100                 | 99                     | 1/66/1429                        | 1/27/964                            | 0.54                   |

\*minor allele frequency

\*\* 398 cases and 427 controls

**Supplemental Figure 1. Genotyping Cluster Plots for Discovery Cohort \***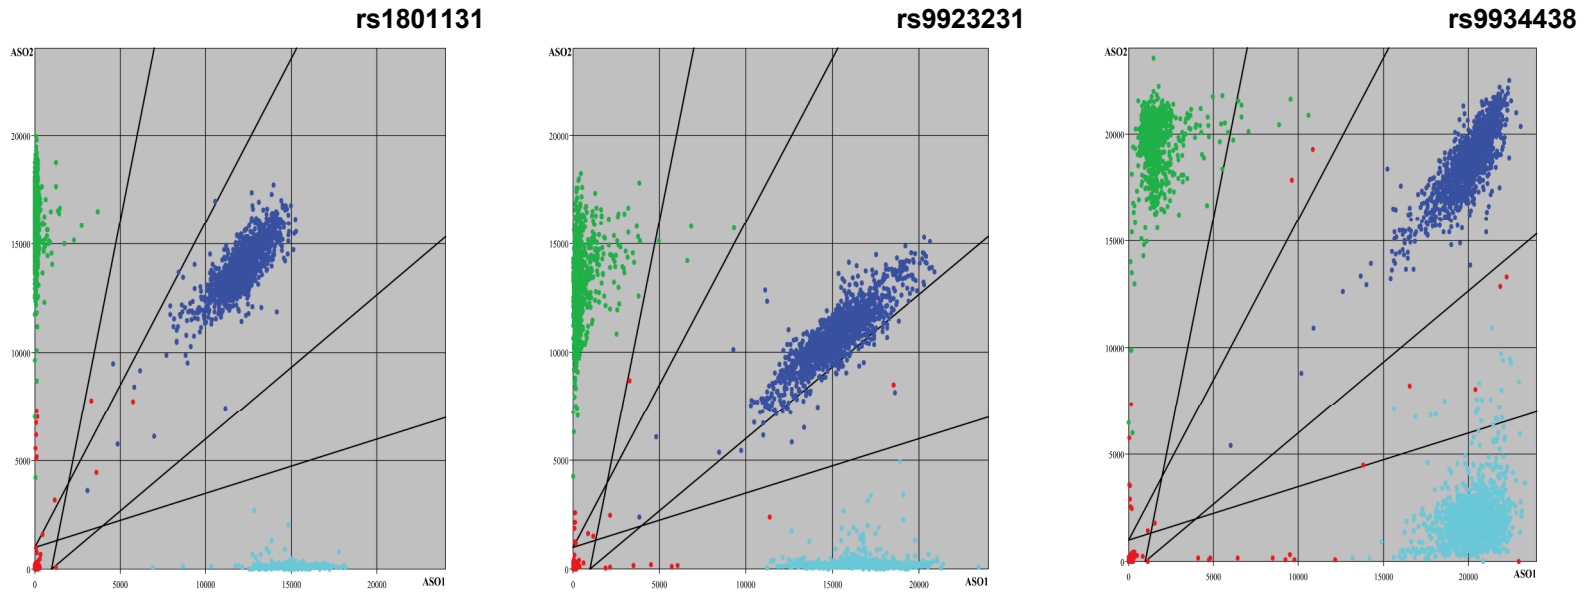

\* plots are from multi-ethnic parent study, a superset of this discovery cohort
